# Supplementary material for: Urinary [TIMP-2] × [IGFBP7] and serum procalcitonin to predict and assess the risk for short-term outcomes in septic and non-septic critically ill patients
Source: Ann Intensive Care. 2020 Apr 21;10:46. doi: 10.1186/s13613-020-00665-9 (PMC7174532; doi:10.1186/s13613-020-00665-9)
Supplement: Supplementary file 2 — Additional file 2. ROC curve analysis for [TIMP-2] × [IGFBP7] and procalcitonine with predefined cut-offs of 0.3 and 0.5 respectively, and the combination of the two results. [file 13613_2020_665_MOESM2_ESM.xlsx]

## Sheet: Foglio1
ANALYSIS COHORT
Variables	AUC	95% CI	Sens	Spec	LR+	LR-	PPV	NPV	Correctly classified
[TIMP-2]x[IGFBP7]>0.3	0.68	0.63-0.73	0.84	0.54	1.82609	0.296296	83.3	59.1	64.4
PCT>0.5	0.73	0.68-0.78	0.78	0.67	2.36364	0.328358	79.2	66.8	71.6
Probabilities([TIMP-2]x[IGFBP7]>0.3_PCT>0.5)	0.79	0.75-0.84	0.68	0.82	3.77778	0.390244	67.8	82.2	76.7
SEPSIS
Variables	AUC	95% CI	Sens	Spec	LR+	LR-	PPV	NPV	Correctly classified
[TIMP-2]x[IGFBP7]>0.3	0.69	0.61-0.77	0.88	0.52	1.83333	0.230769	87.1	51.1	69.6
PCT>0.5	0.63	0.55-0.71	0.95	0.32	1.39706	0.15625	94.6	31.8	64.1
Probabilities([TIMP-2]x[IGFBP7]>0.3_PCT>0.5)	0.76	0.69-0.83	0.84	0.66	2.47059	0.242424	83.9	65.9	75.1
NON-SEPSIS
Variables	AUC	95% CI	Sens	Spec	LR+	LR-	PPV	NPV	Correctly classified
[TIMP-2]x[IGFBP7]>0.3	0.66	0.59-0.73	0.8	0.55	1.77778	0.363636	78.7	51.1	70.6
PCT>0.5	0.72	0.65-0.79	0.57	0.84	3.5625	0.511905	60	84.2	77
Probabilities([TIMP-2]x[IGFBP7]>0.3_PCT>0.5)	0.78	0.72-0.85	0.6	0.84	3.75	0.47619	48	90.4	77.8
[TIMP-2]x[IGFBP7] tissue inhibitor metalloprotease 2 and insulin-like growth factor binding protein product, PCT procalcitonin, AUC area under the curve, Sens sensitivity, Spec specificity, LR likelihood ratio, PPV positive predictive value, NPV negative predicitive value
